# Supplementary material for: Partial Deficiency of Zfp217 Resists High-Fat Diet-Induced Obesity by Increasing Energy Metabolism in Mice
Source: MDPI journal article supplement (doi:10.3390/ijms22105390), 2021-05-20
Supplement: s1 [file s1]

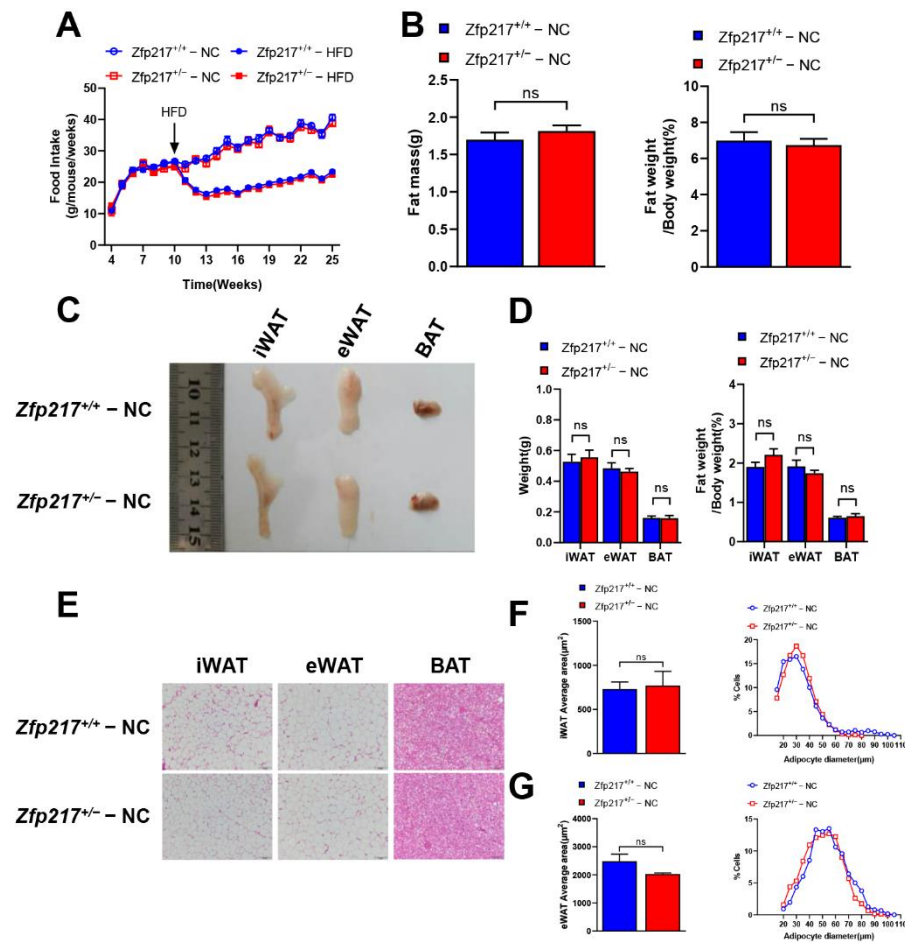

Figure S1. Zfp217<sup>+/-</sup> mice exhibit no phenotypic alterations compared to Zfp217<sup>+/+</sup> mice fed normal chow diet (NC). (A) Food intake of Zfp217<sup>+/+</sup> and Zfp217<sup>+/-</sup> mice under NC or HFD (n = 8 per group). (B) Body fat weight or percentage of Zfp217<sup>+/+</sup> and Zfp217<sup>+/-</sup> mice (n = 8 per group). (C) Gross appearance of adipose tissues from representative Zfp217<sup>+/+</sup> and Zfp217<sup>+/-</sup> mice at 26 weeks. (D) iWAT, eWAT, BAT weight or percentage of Zfp217<sup>+/+</sup> and Zfp217<sup>+/-</sup> mice (n = 8 per group). (E) H&E staining of adipose tissue from Zfp217<sup>+/+</sup> and Zfp217<sup>+/-</sup> mice (Scale bar: 100  $\mu$ m) (n = 6 per group). (F, G) Average cell area (left) and adipocyte size distribution (right) in iWAT (F) and eWAT (G) of Zfp217<sup>+/+</sup> and Zfp217<sup>+/-</sup> mice (n = 6 per group). For all statistical plots, data are presented as the mean  $\pm$  SEM. \**P* < 0.05; \*\**P* < 0.01 and ns indicates no significance between the two indicated groups.

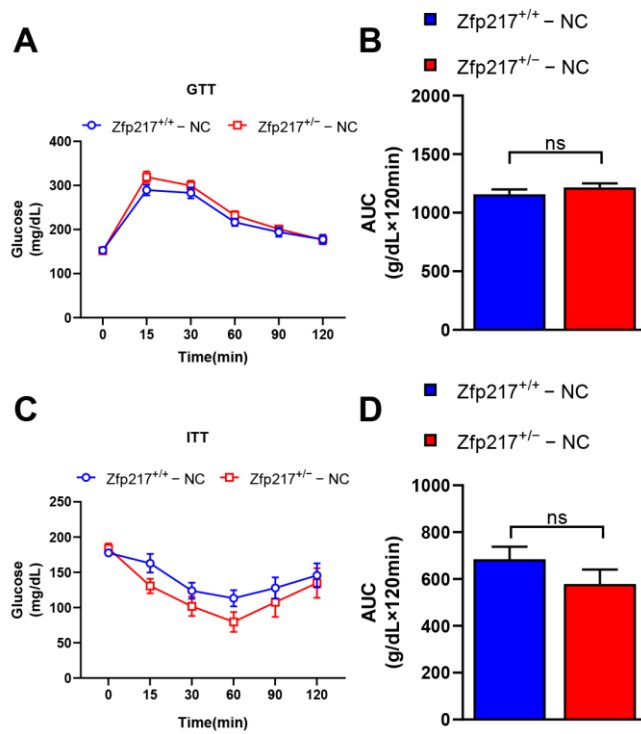

Figure S2. Zfp217<sup>+/-</sup> mice and Zfp217<sup>+/+</sup> mice exhibit similar glucose tolerance and insulin sensitivity under NC. (A, B) IP glucose tolerance test (GTT) were performed in Zfp217<sup>+/+</sup> and Zfp217<sup>+/-</sup> mice at 14 weeks, and the corresponding areas under the curves were calculated (n = 8 per group). Comparison at each time point was made against Zfp217<sup>+/+</sup> control mice by Two-way ANOVA. (C, D) IP insulin tolerance test (ITT) were performed in Zfp217<sup>+/+</sup> and Zfp217<sup>+/-</sup> mice at 15 weeks, and the corresponding areas under the curves were calculated (n = 8 per group). Comparison at each time point was made against Zfp217<sup>+/+</sup> control mice by Two-way ANOVA. For all statistical plots, data are presented as the mean  $\pm$  SEM. \**P* < 0.05; \*\**P* < 0.01, and ns indicates no significance between the two indicated groups.

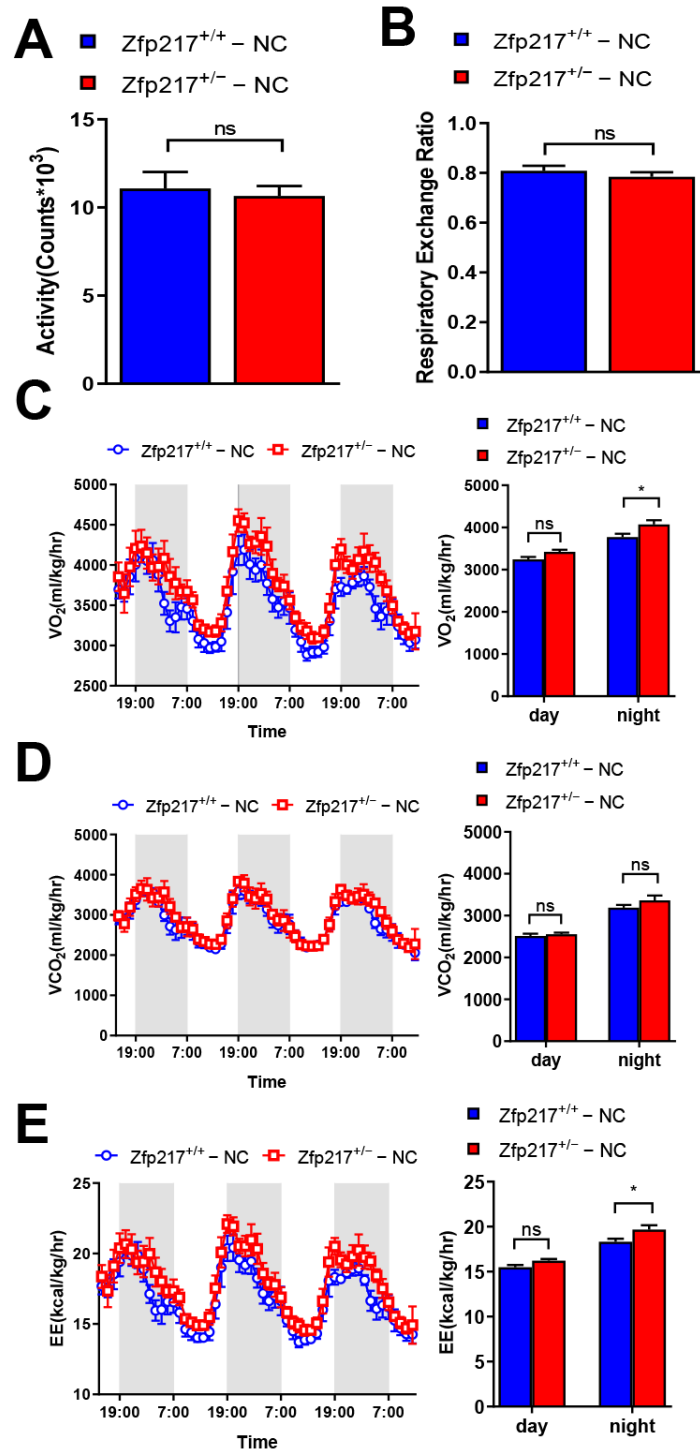

Figure S3. Zfp217<sup>+/-</sup> mice exhibit no difference compared to the Zfp217<sup>+/+</sup> mice in energy expenditure under NC. (A) Physical activity, (B) Respiratory exchange ratio, (C) Oxygen consumption (VO<sub>2</sub>), (D) Carbon dioxide generation (VCO<sub>2</sub>)

and (E) Energy expenditure analyzed by indirect calorimetry in *Zfp217<sup>+/+</sup>* and *Zfp217<sup>+/-</sup>* mice after NC feeding for 25 weeks (n=6 per group). For all statistical plots, data are presented as the mean  $\pm$  SEM. \**P* < 0.05; \*\**P* < 0.01, and ns indicates no significance between the two indicated groups.

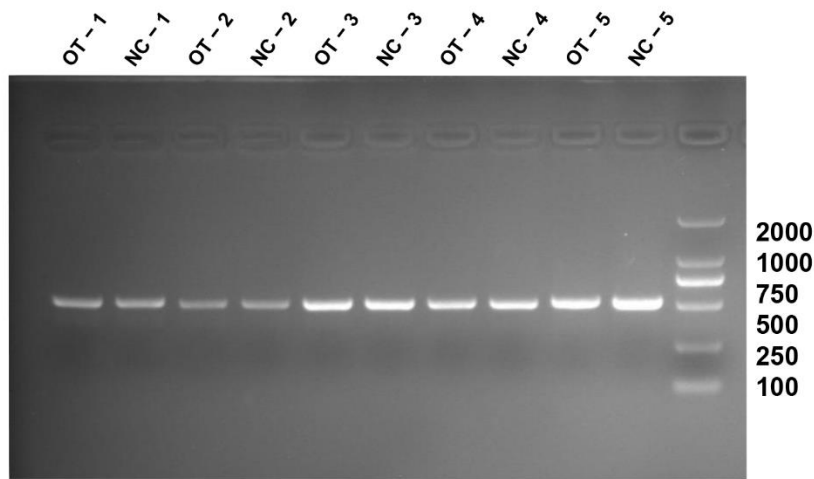

Figure S4. Detection of the five most likely off-target sites of sgRNA2' on the genome by PCR and agarose gel electrophoresis.

Table S1 Quantification real-time PCR primer sequence

| Gene                            | Primer sequence                                         | Retardation<br>temperature, °C | Product length, bp |
|---------------------------------|---------------------------------------------------------|--------------------------------|--------------------|
| <i>Zfp217</i>                   | F: CTCTCTAGGCTCCCAGATGGA<br>R: AGAACATGCAATCCAGGGGC     | 60                             | 131                |
| <i>PPAR<math>\gamma</math></i>  | F: TCGCTGATGCACTGCCTATG<br>R: GAGAGGTCCACAGAGCTGATT     | 60                             | 103                |
| <i>Ap2</i>                      | F: ATCAGCGTAAATGGGGATTTGG<br>R: GTCTGCGGTGATTTTCATCGAA  | 60                             | 105                |
| <i>C/EBP<math>\alpha</math></i> | F: CAAGAACAGCAACGAGTACCG<br>R: GTCACTGGTCAACTCCAGCAC    | 60                             | 124                |
| <i>adiponectin</i>              | F: TGTTCCTCTTAATCCTGCCCCA<br>R: CCAACCTGCACAAGTTCCC     | 60                             | 104                |
| <i>ACOX1</i>                    | F: TAACTTCCTCACTCGAAGCCA<br>R: AGTTCCATGACCCATCTCTGTC   | 60                             | 283                |
| <i>ACC1</i>                     | F: ATGGGCGGAATGGTCTCTTTC<br>R: TGGGGACCTTGTCTTCATCAT    | 60                             | 148                |
| <i>ELOVL6</i>                   | F: GAAAAGCAGTTCAACGAGAACG<br>R: AGATGCCGACCACCAAAGATA   | 60                             | 110                |
| <i>FAS</i>                      | F: TATCAAGGAGGCCCATTTTGC<br>R: TGTTTCCACCTCTAAACCATGCT  | 60                             | 195                |
| <i>Perlipin A</i>               | F: CTGTGTGCAATGCCTATGAGA<br>R: CTGGAGGGTATTGAAGAGCCG    | 60                             | 171                |
| <i>HSL</i>                      | F: GATTTACGCACGATGACACAGT<br>R: ACCTGCAAAGACATTAGACAGC  | 60                             | 114                |
| <i>LPL</i>                      | F: GGGAGTTTGGCTCCAGAGTTT<br>R: TGTGTCTTCAGGGGTCCTTAG    | 60                             | 115                |
| <i>SCD1</i>                     | F: TTCTTGCGATACACTCTGGTGTC<br>R: CGGGATTGAATGTTCTTGTCGT | 60                             | 98                 |

|                |                             |    |     |
|----------------|-----------------------------|----|-----|
| <i>β-actin</i> | F: CACGATGGAGGGGCGGACTCATC  | 60 | 241 |
|                | R: TAAAGACCTCTATGCCAACACAGT |    |     |
| 18s            | F: TTGACGGAAGGGCACCACCAG    | 60 | 130 |
|                | R: GCACCACCACCCACGGAATCG    |    |     |

Table S2 Primer design for off-target site

| Primer name        | Primer sequence        | Location on the genome |
|--------------------|------------------------|------------------------|
| <i>OT-Zfp217-1</i> | F: AAGTTTAGGTAGCAGGAT  | Chr11: +93805835       |
|                    | R: GATGGAAGAAATGGCAGA  |                        |
| <i>OT-Zfp217-2</i> | F: TGAGAAGGTTTTGGACTA  | Chr18: -65234377       |
|                    | R: TTTCCCGTGTCACCTTCAT |                        |
| <i>OT-Zfp217-3</i> | F: GGACCTGGACCTGTAGTTT | Chr9: -44661009        |
|                    | R: CATGCCCAAGTATTACCC  |                        |
| <i>OT-Zfp217-4</i> | F: CTTCAGGCACATAGTCAGC | Chr14: +9351328        |
|                    | R: TACCTATTGGAGCCTTCT  |                        |
| <i>OT-Zfp217-5</i> | F: CCTTCCTCCCAGACCATC  | Chr16: -144443447      |
|                    | R: AGGCCATTCTGGA ACTCA |                        |
